# Supplementary material
Source: PubMed Central journal article supplement (PMC4980690)
Supplement: ct6b00498_si_001.pdf [file ct6b00498_si_001.pdf]

# Excited-State Dipole and Quadrupole Moments: TD-DFT versus CC2: Supporting Information

Denis JACQUEMIN<sup>\*,†,‡</sup>

*Laboratoire CEISAM - UMR CNRS 6230, Université de Nantes, 2 Rue de la Houssinière,  
BP 92208, 44322 Nantes Cedex 3, France, and Institut Universitaire de France, 1 rue  
Descartes, 7531 Paris Cedex 5, France*

E-mail: Denis.Jacquemin@univ-nantes.fr

---

\*To whom correspondence should be addressed

†CEISAM, Nantes

‡IUF, Paris

# S1 Impact of the geometry optimization level

Table S-1: Ground-state dipole moments,  $\mu^{\text{GS}}$ , and excites-state dipole moments  $\mu^{\text{ES}}$  in Debye, for the three first compounds using three different GS geometries and four different levels of theory.

| Mol.              | State                         | BLYP/6-31+G(d) geom. |      |       |        | B3LYP/6-31+G(d) geom. |      |       |        | M06-2X/6-31+G(d) geom. |      |       |        |
|-------------------|-------------------------------|----------------------|------|-------|--------|-----------------------|------|-------|--------|------------------------|------|-------|--------|
|                   |                               | CC2                  | BLYP | B3LYP | M06-2X | CC2                   | BLYP | B3LYP | M06-2X | CC2                    | BLYP | B3LYP | M06-2X |
| $\mu^{\text{GS}}$ |                               |                      |      |       |        |                       |      |       |        |                        |      |       |        |
| <b>1</b>          |                               | 4.24                 | 4.28 | 4.46  | 4.56   | 4.15                  | 4.19 | 4.36  | 4.46   | 4.02                   | 4.05 | 4.22  | 4.32   |
| <b>2</b>          |                               | 4.27                 | 4.70 | 4.72  | 4.60   | 4.29                  | 4.68 | 4.70  | 4.57   | 4.22                   | 4.59 | 4.60  | 4.47   |
| <b>3</b>          |                               | 2.33                 | 2.79 | 2.56  | 2.33   | 2.31                  | 2.76 | 2.54  | 2.31   | 2.23                   | 2.65 | 2.44  | 2.23   |
| $\mu^{\text{ES}}$ |                               |                      |      |       |        |                       |      |       |        |                        |      |       |        |
| <b>1</b>          | $B_2 (\pi \rightarrow \pi^*)$ | 4.08                 | 4.11 | 4.25  | 4.24   | 3.99                  | 4.02 | 4.16  | 4.14   | 3.87                   | 3.91 | 4.02  | 4.00   |
| <b>2</b>          | $A'(\pi \rightarrow \pi^*)$   | 7.05                 | 7.38 | 6.88  | 6.64   | 7.06                  | 7.51 | 6.96  | 6.65   | 6.99                   | 7.65 | 7.02  | 6.64   |
|                   | $A''(n \rightarrow \pi^*)$    | 1.22                 | 1.07 | 0.97  | 0.97   | 1.28                  | 1.17 | 1.02  | 0.97   | 1.29                   | 1.23 | 1.02  | 0.95   |
| <b>3</b>          | $A (\pi \rightarrow \pi^*)$   | 6.74                 | 8.87 | 6.68  | 5.38   | 6.66                  | 9.16 | 6.84  | 5.43   | 6.43                   | 9.83 | 7.15  | 5.44   |

## S2 Results for the first set of compounds

Table S-2: Ground-state dipole moments,  $\mu^{\text{GS}}$ , given in Debye, for the first fifteen compounds treated.

|                       | CG2               | SVWN5 | BLYP  | BP86  | OLYP  | M06-L | M11-L | B3LYP | PBE0  | M06  | BMK   | SOGGA11-X | M06-2X | M06-HF | CAM-B3LYP | M11  | $\epsilon_{\text{B97X-D}}$ |
|-----------------------|-------------------|-------|-------|-------|-------|-------|-------|-------|-------|------|-------|-----------|--------|--------|-----------|------|----------------------------|
| <b>1</b>              | 4.02              | 4.07  | 4.05  | 4.00  | 4.01  | 4.07  | 3.97  | 4.22  | 4.21  | 4.25 | 4.36  | 4.27      | 4.32   | 4.46   | 4.37      | 4.43 | 4.32                       |
| <b>2</b>              | 4.22              | 4.62  | 4.59  | 4.55  | 4.54  | 4.50  | 4.50  | 4.60  | 4.55  | 4.51 | 4.62  | 4.56      | 4.47   | 4.50   | 4.56      | 4.54 | 4.50                       |
| <b>3</b>              | 2.23              | 2.78  | 2.65  | 2.71  | 2.68  | 2.64  | 2.72  | 2.44  | 2.72  | 2.39 | 2.27  | 2.30      | 2.23   | 1.99   | 2.24      | 2.13 | 2.24                       |
| <b>4</b>              | 8.25              | 8.58  | 8.47  | 8.42  | 8.41  | 8.42  | 8.43  | 8.77  | 8.77  | 8.63 | 9.09  | 8.91      | 8.91   | 9.35   | 8.95      | 9.06 | 8.85                       |
| <b>5</b>              | 3.53              | 3.78  | 3.81  | 3.75  | 3.74  | 3.83  | 3.85  | 4.03  | 4.00  | 4.04 | 4.19  | 4.14      | 4.04   | 4.26   | 4.10      | 4.09 | 4.04                       |
| <b>6</b>              | 3.60              | 3.96  | 3.79  | 3.83  | 3.79  | 3.57  | 3.29  | 3.46  | 3.40  | 3.14 | 3.30  | 3.13      | 3.08   | 2.91   | 3.14      | 3.08 | 3.12                       |
| <b>7</b>              | 2.05              | 2.06  | 2.00  | 2.03  | 2.01  | 1.95  | 1.92  | 1.93  | 1.93  | 1.82 | 1.89  | 1.86      | 1.87   | 1.84   | 1.86      | 1.85 | 1.85                       |
| <b>8</b>              | 4.62              | 5.03  | 4.95  | 4.93  | 4.92  | 4.85  | 4.87  | 4.96  | 4.93  | 4.87 | 4.98  | 4.92      | 4.87   | 4.96   | 4.88      | 4.84 | 4.83                       |
| <b>9</b>              | 8.28              | 7.13  | 7.20  | 7.20  | 7.24  | 7.51  | 7.65  | 8.12  | 8.33  | 8.41 | 8.90  | 8.99      | 9.12   | 9.71   | 9.21      | 9.50 | 9.36                       |
| <b>10</b>             | 9.15              | 10.22 | 10.09 | 10.03 | 10.02 | 9.93  | 9.84  | 10.09 | 10.02 | 9.90 | 10.14 | 9.95      | 9.96   | 10.17  | 9.95      | 9.95 | 9.80                       |
| <b>11<sup>a</sup></b> | 0.00 <sup>b</sup> | 1.10  | 0.92  | 1.01  | 0.96  | 0.80  | 0.70  | 0.57  | 0.59  | 0.42 | 0.37  | 0.34      | 0.38   | 0.25   | 0.26      | 0.27 | 0.28                       |
| <b>12</b>             | 2.02              | 1.99  | 1.94  | 1.96  | 1.94  | 1.89  | 1.86  | 1.89  | 1.90  | 1.80 | 1.87  | 1.85      | 1.86   | 1.88   | 1.85      | 1.86 | 1.85                       |
| <b>13</b>             | 4.46              | 5.07  | 5.09  | 5.00  | 4.99  | 4.93  | 4.95  | 5.03  | 4.92  | 4.92 | 4.94  | 4.91      | 4.75   | 4.74   | 4.86      | 4.72 | 4.75                       |
| <b>14</b>             | 4.68              | 5.16  | 5.10  | 5.09  | 5.07  | 5.04  | 4.98  | 5.10  | 5.07  | 4.99 | 5.11  | 5.04      | 4.96   | 5.00   | 5.02      | 4.99 | 4.97                       |
| <b>15</b>             | 1.90              | 1.71  | 1.75  | 1.75  | 1.79  | 1.75  | 1.72  | 1.88  | 1.91  | 1.76 | 2.05  | 1.98      | 1.99   | 2.20   | 1.97      | 2.07 | 2.00                       |

<sup>a</sup>Taken at the center of mass (charged molecule); <sup>b</sup>0.0046 D

Table S-3: Excited-state dipole moments,  $\mu^{\text{ES}}$ , given in Debye, for the first fifteen compounds treated.

| State                           | Q <sub>2</sub>    | S <sub>VWN<sub>5</sub></sub> | BLYP  | BP86  | OLYP  | M06-L | M11-L             | B3LYP | PBE0              | M06               | BMK   | SOGGA11-X | M06-2X | M06-HF | CAM-B3LYP | M11   | $\epsilon^{\text{B97X-D}}$ |
|---------------------------------|-------------------|------------------------------|-------|-------|-------|-------|-------------------|-------|-------------------|-------------------|-------|-----------|--------|--------|-----------|-------|----------------------------|
| 1 $B_2(\pi \rightarrow \pi^*)$  | 3.87              | 3.92                         | 3.91  | 3.84  | 3.87  | 3.93  | 3.79              | 4.02  | 3.98              | 3.99              | 4.07  | 3.98      | 4.00   | 4.05   | 4.03      | 4.02  | 3.97                       |
| 2 $A'(\pi \rightarrow \pi^*)$   | 6.99              | 7.87                         | 7.65  | 7.62  | 7.60  | 7.41  | 7.05              | 7.02  | 6.90              | 6.78              | 6.81  | 6.71      | 6.64   | 6.49   | 6.60      | 6.43  | 6.43                       |
| $A''(n \rightarrow \pi^*)$      | 1.29              | 1.23                         | 1.23  | 1.27  | 1.27  | 1.28  | 1.33              | 1.02  | 1.02              | 1.01              | 0.96  | 0.95      | 0.95   | 0.59   | 1.01      | 0.98  | 1.01                       |
| 3 $A(\pi \rightarrow \pi^*)$    | 6.43              | 10.27                        | 9.83  | 10.15 | 9.51  | 9.94  | 5.20 <sup>a</sup> | 7.15  | 6.96              | 6.66 <sup>b</sup> | 5.93  | 5.59      | 5.44   | 4.07   | 5.09      | 4.38  | 4.91                       |
| 4 $A(\pi \rightarrow \pi^*)$    | 8.64              | 9.12                         | 8.93  | 8.89  | 8.81  | 8.83  | 5.20 <sup>a</sup> | 9.21  | 9.19              | 9.00              | 9.56  | 9.26      | 9.38   | 9.80   | 9.37      | 9.48  | 9.25                       |
| 5 $A(n \rightarrow \pi^*)$      | 5.79              | 5.77                         | 5.61  | 5.58  | 5.54  | 5.55  | 5.19 <sup>a</sup> | 6.10  | 6.15              | 5.90              | 6.66  | 6.34      | 6.58   | 6.89   | 6.51      | 6.73  | 6.38                       |
| 5 $A(n \rightarrow \pi^*)$      | 1.31              | 1.89                         | 1.84  | 1.92  | 1.92  | 1.92  | 2.05              | 1.10  | 0.99              | 0.96              | 0.15  | 0.37      | 0.29   | 1.43   | 0.16      | 0.58  | 0.22                       |
| 5 $A(\pi \rightarrow \pi^*)$    | 4.70 <sup>c</sup> | 4.96                         | 4.98  | 4.89  | 4.89  | 4.99  | 4.63              | 5.19  | 5.14              | 5.10              | 5.40  | 5.22      | 5.30   | 5.47   | 5.25      | 5.28  | 5.17                       |
| 6 $A(\pi \rightarrow \pi^*)$    | 6.39              | 5.54                         | 5.52  | 5.54  | 5.58  | 5.60  | 5.52              | 5.62  | 5.66              | 5.50              | 5.74  | 5.72      | 5.77   | 5.95   | 5.50      | 5.56  | 5.39                       |
| 7 $A(\pi \rightarrow \pi^*)$    | 3.81              | 4.09                         | 3.94  | 4.03  | 3.96  | 3.98  | 3.58              | 3.69  | 3.69              | 3.38              | 3.61  | 3.45      | 3.48   | 3.27   | 3.46      | 3.47  | 3.46                       |
| 8 $A(\pi \rightarrow \pi^*)$    | 8.44              | 9.96                         | 9.91  | 9.83  | 9.82  | 9.86  | 9.29              | 9.58  | 9.44              | 9.09              | 9.23  | 8.98      | 8.67   | 8.05   | 8.76      | 8.30  | 8.63                       |
| 9 $A_1(\pi \rightarrow \pi^*)$  | 4.31              | 2.32                         | 2.17  | 2.19  | 2.09  | 1.68  | 2.31              | 2.49  | 2.25              | 2.31              | 0.83  | 1.11      | 0.20   | 1.52   | 0.11      | 1.02  | 0.12                       |
| 9 $B_1(\pi \rightarrow \pi^*)$  | 5.52              | 0.74                         | 0.56  | 0.60  | 0.75  | 0.73  | 1.67              | 1.95  | 2.04              | 2.86              | 2.71  | 3.13      | 1.52   | 3.16   | 2.94      | 3.16  | 2.69                       |
| 10 $A(\pi \rightarrow \pi^*)$   | 13.31             | 12.63                        | 12.48 | 12.36 | 12.31 | 12.21 | 11.82             | 12.37 | 12.30             | 12.05             | 12.61 | 12.25     | 12.60  | 13.13  | 12.44     | 12.65 | 12.28                      |
| 11 $B_2(\pi \rightarrow \pi^*)$ | 1.32              | 2.36                         | 2.16  | 2.27  | 2.22  | 2.12  | 2.11              | 1.87  | 1.90              | 1.70              | 1.69  | 1.65      | 1.68   | 1.56   | 1.56      | 1.63  | 1.61                       |
| 12 $A'(\pi \rightarrow \pi^*)$  | 3.03              | 3.23                         | 3.13  | 3.17  | 3.14  | 3.09  | 3.12              | 3.06  | 3.07              | 2.72              | 2.97  | 2.94      | 2.88   | 2.76   | 2.90      | 2.82  | 2.90                       |
| 13 $A(n \rightarrow \pi^*)$     | 0.47              | 3.24                         | 3.17  | 3.30  | 3.38  | 3.22  | 3.17              | 0.81  | 1.54 <sup>d</sup> | 0.61              | 1.27  | 0.57      | 0.81   | 0.79   | 0.76      | 0.92  | 0.72                       |
| 13 $A(\pi \rightarrow \pi^*)$   | 9.11              | 10.36                        | 10.30 | 10.21 | 10.25 | 10.13 | 8.89              | 8.47  | 6.39 <sup>d</sup> | 7.90              | 7.24  | 7.67      | 7.59   | 7.03   | 7.36      | 6.94  | 7.04                       |
| 14 $A(\pi \rightarrow \pi^*)$   | 8.45              | 9.71                         | 9.44  | 9.48  | 9.38  | 9.09  | 7.87              | 7.80  | 7.60              | 7.07              | 7.28  | 7.01      | 7.00   | 6.61   | 6.76      | 6.47  | 6.59                       |
| 15 $A'(\pi \rightarrow \pi^*)$  | 0.87              | 7.84                         | 7.70  | 7.53  | 7.55  | 6.69  | 6.52              | 3.05  | 2.42              | 1.66              | 1.04  | 0.91      | 0.62   | 0.95   | 0.54      | 0.77  | 0.62                       |

<sup>a</sup>M11-L provides a different picture for the low-lying  $\pi \rightarrow \pi^*$  ES in these two compounds, and no direct comparison is therefore possible; <sup>b</sup>Average value from two nearly-degenerate ES at 3.59 eV ( $\mu^{\text{ES}} = 10.91$  D) and 3.64 eV ( $\mu^{\text{ES}} = 2.41$  D); <sup>c</sup>Average value from two nearly-degenerate ES at 4.11 eV ( $\mu^{\text{ES}} = 4.71$  D) and 4.12 eV ( $\mu^{\text{ES}} = 4.69$  D); <sup>d</sup>PBE0 forcees these two ES at almost the same energy (3.24 and 3.25 eV), and as a consequence of the lack of symmetry, they are strongly mixed.

Table S-4: Statistical analysis obtained for the compounds of Scheme 1 (Tables S-2 and S-3). MSE, MAE, Max(+) and Max(-) give the mean signed error, mean absolute error, maximal positive and negative deviations, respectively, whereas  $R^2$  is the linear determination coefficients. The TD-DFT errors are given with respect to CC2, and are in D (but  $R^2$ ).

|                    | $\mu^{\text{GS}}$ |       |        |        | $\mu^{\text{ES}}$ |       |        |        | $R^2$ |
|--------------------|-------------------|-------|--------|--------|-------------------|-------|--------|--------|-------|
|                    | MSE               | MAE   | Max(+) | Max(-) | MSE               | MAE   | Max(+) | Max(-) |       |
| SVWN5              | 0.283             | 0.464 | 1.100  | -1.144 | 0.649             | 1.488 | 6.967  | -4.782 | 0.621 |
| BLYP               | 0.225             | 0.406 | 0.937  | -1.080 | 0.520             | 1.423 | 6.824  | -4.962 | 0.623 |
| BP86               | 0.216             | 0.394 | 1.006  | -1.075 | 0.531             | 1.440 | 6.656  | -4.916 | 0.619 |
| OLYP               | 0.205             | 0.376 | 0.957  | -1.036 | 0.488             | 1.396 | 6.678  | -4.775 | 0.627 |
| M06-L              | 0.177             | 0.334 | 0.791  | -0.768 | 0.410             | 1.366 | 5.818  | -4.794 | 0.649 |
| M11-L <sup>a</sup> | 0.148             | 0.344 | 0.693  | -0.627 | 0.090             | 1.129 | 5.648  | -3.850 | 0.649 |
| B3LYP              | 0.271             | 0.347 | 0.939  | -0.157 | -0.124            | 0.775 | 2.176  | -3.569 | 0.882 |
| PBE0 <sup>a</sup>  | 0.282             | 0.341 | 0.864  | -0.203 | -0.209            | 0.783 | 1.543  | -3.481 | 0.859 |
| M06                | 0.188             | 0.328 | 0.747  | -0.459 | -0.390            | 0.707 | 0.789  | -2.664 | 0.927 |
| BMK                | 0.337             | 0.420 | 0.993  | -0.304 | -0.415            | 0.896 | 0.919  | -3.482 | 0.878 |
| SOGGA11-X          | 0.275             | 0.386 | 0.794  | -0.469 | -0.511            | 0.793 | 0.625  | -3.200 | 0.910 |
| M06-2X             | 0.252             | 0.369 | 0.839  | -0.525 | -0.633            | 0.953 | 0.791  | -4.114 | 0.853 |
| M06-HF             | 0.347             | 0.519 | 1.436  | -0.696 | -0.524            | 0.919 | 1.162  | -2.794 | 0.883 |
| CAM-B3LYP          | 0.281             | 0.390 | 0.938  | -0.459 | -0.647            | 0.949 | 0.733  | -4.204 | 0.874 |
| M11                | 0.291             | 0.422 | 1.222  | -0.518 | -0.624            | 0.950 | 0.937  | -3.290 | 0.881 |
| $\omega$ B97X-D    | 0.250             | 0.362 | 1.080  | -0.477 | -0.732            | 0.982 | 0.610  | -4.190 | 0.866 |

<sup>a</sup>For both M11-L and PBE0, the problematic data have been removed for the statistics of  $\mu^{\text{ES}}$  (see footnotes <sup>a</sup> and <sup>d</sup> in Table S-3).

## S3 Results for the second set of compounds

Table S-5: Ground-state dipole moments,  $\mu^{\text{GS}}$ , given in Debye, for the second set of compounds treated.

|           | CC2  | B3LYP | PBE0 | M06  | BMK  | SOGGA11-X | M06-2X | M06-HF | CAM-B3LYP | M11  | $\omega$ B97X-D |
|-----------|------|-------|------|------|------|-----------|--------|--------|-----------|------|-----------------|
| <b>16</b> | 2.18 | 2.12  | 2.12 | 2.01 | 2.10 | 2.06      | 2.09   | 2.18   | 2.07      | 2.14 | 2.08            |
| <b>17</b> | 7.88 | 8.19  | 8.12 | 7.74 | 7.86 | 7.72      | 7.53   | 7.24   | 7.52      | 7.32 | 7.41            |
| <b>18</b> | 0.61 | 0.69  | 0.72 | 0.58 | 0.72 | 0.73      | 0.66   | 0.66   | 0.69      | 0.67 | 0.71            |
| <b>19</b> | 1.31 | 1.39  | 1.47 | 1.23 | 1.51 | 1.49      | 1.38   | 1.47   | 1.43      | 1.44 | 1.48            |
| <b>20</b> | 6.06 | 6.49  | 6.48 | 6.48 | 6.66 | 6.65      | 6.51   | 6.68   | 6.62      | 6.59 | 6.57            |
| <b>21</b> | 7.09 | 7.30  | 7.26 | 7.01 | 7.27 | 7.05      | 7.05   | 7.07   | 7.05      | 7.11 | 6.96            |
| <b>22</b> | 3.51 | 3.72  | 3.71 | 3.67 | 3.78 | 3.70      | 3.67   | 3.76   | 3.67      | 3.66 | 3.62            |
| <b>23</b> | 0.86 | 1.13  | 1.06 | 1.02 | 0.91 | 0.98      | 0.83   | 0.65   | 0.87      | 0.71 | 0.84            |
| <b>24</b> | 1.92 | 1.89  | 1.89 | 1.88 | 1.94 | 1.88      | 1.89   | 1.93   | 1.93      | 1.94 | 1.91            |
| <b>25</b> | 8.39 | 8.44  | 8.34 | 8.04 | 8.18 | 7.96      | 7.85   | 7.51   | 7.87      | 7.82 | 7.76            |
| <b>26</b> | 2.48 | 2.41  | 2.45 | 2.42 | 2.43 | 2.42      | 2.45   | 2.47   | 2.48      | 2.51 | 2.50            |
| <b>27</b> | 4.78 | 4.99  | 5.00 | 4.87 | 5.04 | 4.94      | 4.91   | 4.99   | 4.95      | 4.99 | 4.91            |
| <b>28</b> | 9.46 | 9.54  | 9.53 | 9.35 | 9.46 | 9.34      | 9.21   | 8.94   | 9.27      | 9.20 | 9.25            |
| <b>29</b> | 3.15 | 3.16  | 3.18 | 3.16 | 3.32 | 3.26      | 3.26   | 3.40   | 3.29      | 3.36 | 3.29            |
| <b>30</b> | 2.73 | 2.71  | 2.66 | 2.63 | 2.71 | 2.58      | 2.62   | 2.65   | 2.65      | 2.68 | 2.60            |
| <b>31</b> | 4.75 | 5.33  | 5.27 | 5.25 | 5.46 | 5.38      | 5.26   | 5.44   | 5.36      | 5.33 | 5.26            |

Table S-6: Excited-state dipole moments,  $\mu^{\text{ES}}$ , given in Debye, for the second set of compounds treated.

|           | State                         | CC2   | B3LYP | PBE0              | M06               | BMK   | SOGGA11-X | M06-2X | M06-HF | CAM-B3LYP | M11   | $\omega$ B97X-D |
|-----------|-------------------------------|-------|-------|-------------------|-------------------|-------|-----------|--------|--------|-----------|-------|-----------------|
| <b>16</b> | $A (\pi \rightarrow \pi^*)$   | 8.86  | 9.08  | 8.59              | 7.44              | 7.15  | 6.83      | 6.25   | 4.48   | 5.66      | 4.56  | 5.21            |
| <b>17</b> | $A (\pi \rightarrow \pi^*)$   | 29.69 | 28.14 | 28.06             | 27.09             | 26.79 | 25.93     | 24.81  | 18.63  | 23.58     | 19.88 | 21.52           |
| <b>18</b> | $A (\pi \rightarrow \pi^*)$   | 0.63  | 1.50  | 1.47              | 0.85              | 0.95  | 0.86      | 0.80   | 0.61   | 0.71      | 0.62  | 0.73            |
| <b>19</b> | $A'' (\pi \rightarrow \pi^*)$ | 1.53  | 1.52  | 1.61              | 1.31              | 1.64  | 1.60      | 1.52   | 1.61   | 1.55      | 1.58  | 1.60            |
| <b>20</b> | $A' (\pi \rightarrow \pi^*)$  | 5.14  | 4.13  | 4.19              | 4.32              | 5.15  | 4.84      | 5.85   | 6.71   | 5.62      | 6.28  | 5.74            |
| <b>21</b> | $A (\pi \rightarrow \pi^*)$   | 14.82 | 13.11 | 13.06             | 12.21             | 12.93 | 12.45     | 12.34  | 11.78  | 12.18     | 11.70 | 11.91           |
| <b>22</b> | $A (n \rightarrow \pi^*)$     | 1.82  | 1.74  | 1.82              | 1.74              | 2.13  | 1.98      | 2.16   | 2.25   | 2.09      | 2.24  | 2.06            |
|           | $B (\pi \rightarrow \pi^*)$   | 4.93  | 4.64  | 4.68              | 4.63              | 4.87  | 4.73      | 4.72   | 4.61   | 4.70      | 4.59  | 4.63            |
| <b>23</b> | $A (\pi \rightarrow \pi^*)$   | 6.25  | 5.59  | 5.32              | 4.83              | 4.76  | 4.52      | 4.46   | 3.51   | 4.12      | 3.55  | 3.87            |
| <b>24</b> | $A' (\pi \rightarrow \pi^*)$  | 2.11  | 1.87  | 1.87              | 1.83              | 1.93  | 1.85      | 1.85   | 1.80   | 1.90      | 1.87  | 1.91            |
| <b>25</b> | $A (\pi \rightarrow \pi^*)$   | 16.71 | 12.99 | 12.98             | 12.47             | 12.96 | 12.67     | 12.73  | 12.61  | 12.54     | 12.39 | 12.19           |
| <b>26</b> | $A (\pi \rightarrow \pi^*)$   | 4.90  | 9.10  | 8.06              | 7.22              | 5.54  | 5.53      | 4.57   | 2.63   | 4.08      | 2.95  | 3.44            |
| <b>27</b> | $A'' (\pi \rightarrow \pi^*)$ | 7.02  | 6.36  | 4.75 <sup>a</sup> | 4.44 <sup>a</sup> | 6.66  | 6.27      | 6.63   | 6.75   | 6.53      | 6.45  | 6.42            |
| <b>28</b> | $A'' (\pi \rightarrow \pi^*)$ | 18.91 | 18.87 | 18.71             | 18.18             | 17.90 | 17.65     | 17.03  | 14.58  | 17.07     | 16.02 | 16.73           |
| <b>29</b> | $A (\pi \rightarrow \pi^*)$   | 3.18  | 3.32  | 3.19              | 2.90              | 2.94  | 2.78      | 2.70   | 2.60   | 2.71      | 2.56  | 2.66            |
| <b>30</b> | $A (\pi \rightarrow \pi^*)$   | 9.77  | 13.11 | 12.24             | 11.47             | 10.36 | 10.10     | 9.00   | 6.94   | 8.73      | 7.63  | 8.03            |
| <b>31</b> | $A' (\pi \rightarrow \pi^*)$  | 6.48  | 5.97  | 5.89              | 5.86              | 6.22  | 6.05      | 6.10   | 6.41   | 6.14      | 6.12  | 6.06            |

<sup>a</sup>Strong state-mixing with both PBE0 and M06.



Table S-7: Statistical analysis obtained for the compounds of Scheme 2 (Tables S-5 and S-6). See caption of Table S-4 for more details.

|                   | $\mu^{\text{GS}}$ |       |        |        | $\mu^{\text{ES}}$ |       |        |         |       |
|-------------------|-------------------|-------|--------|--------|-------------------|-------|--------|---------|-------|
|                   | MSE               | MAE   | Max(+) | Max(-) | MSE               | MAE   | Max(+) | Max(-)  | $R^2$ |
| B3LYP             | 0.148             | 0.170 | 0.583  | -0.067 | 0.996             | 0.996 | 0.996  | -3.724  | 0.947 |
| PBE0 <sup>a</sup> | 0.133             | 0.162 | 0.522  | -0.071 | 0.997             | 0.997 | 3.158  | -3.731  | 0.963 |
| M06 <sup>a</sup>  | 0.012             | 0.156 | 0.503  | -0.352 | 0.994             | 0.994 | 2.321  | -4.248  | 0.967 |
| BMK               | 0.138             | 0.184 | 0.711  | -0.205 | 0.993             | 0.993 | 0.642  | -3.750  | 0.985 |
| SOGGA11-X         | 0.062             | 0.200 | 0.630  | -0.431 | 0.991             | 0.991 | 0.632  | -4.040  | 0.984 |
| M06-2X            | 0.001             | 0.185 | 0.516  | -0.543 | 0.992             | 0.992 | 0.713  | -4.877  | 0.986 |
| M06-HF            | -0.005            | 0.288 | 0.697  | -0.882 | 0.980             | 0.980 | 1.565  | -11.056 | 0.938 |
| CAM-B3LYP         | 0.036             | 0.197 | 0.613  | -0.517 | 0.990             | 0.990 | 0.477  | -6.106  | 0.981 |
| M11               | 0.020             | 0.225 | 0.582  | -0.569 | 0.988             | 0.988 | 1.136  | -9.810  | 0.952 |
| $\omega$ B97X-D   | 0.000             | 0.212 | 0.508  | -0.625 | 0.990             | 0.990 | 0.597  | -8.166  | 0.970 |

<sup>a</sup>For both PBE0 and M06 the problematic data have been removed for the statistics of  $\mu^{\text{ES}}$  (see footnote <sup>a</sup> in Table S-6).

## S4 Error patterns for the GS dipoles

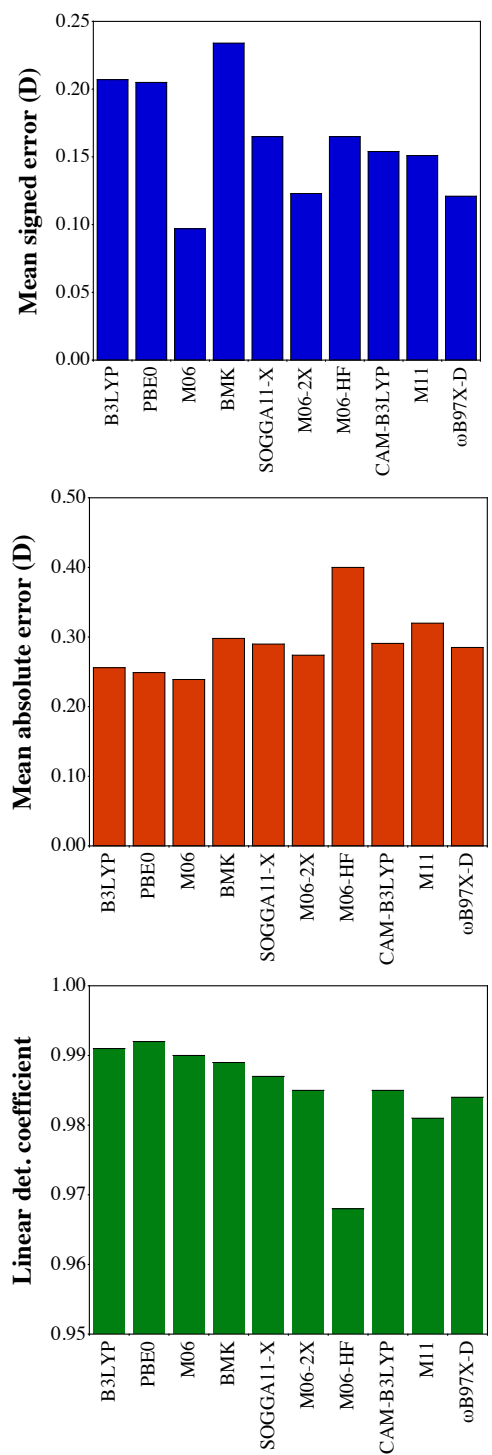

Figure S-1: MSE (top), MAE (center) and  $R^2$  (bottom) determined for the  $\mu^{\text{GS}}$  of the 31 compounds investigated here.

## S5 Push-pull oligomers

### S5.1 Raw values

Table S-8: Transition energies ( $\Delta E$ , in eV), ground-state, excited-state and excess dipole moments (in D) for the push-pull chains. All values determined with the *aug-cc-pVDZ* atomic basis set.

| $N$ | CC2        |                   |                   | BLYP       |                   |                   | B3LYP      |                   |                   | CAM-B3LYP  |                   |                   |       |       |       |       |
|-----|------------|-------------------|-------------------|------------|-------------------|-------------------|------------|-------------------|-------------------|------------|-------------------|-------------------|-------|-------|-------|-------|
|     | $\Delta E$ | $\mu^{\text{GS}}$ | $\mu^{\text{ES}}$ |       |       |       |       |
| 1   | 4.850      | 6.62              | 11.32             | 4.71       | 4.397             | 7.17              | 8.91       | 1.80              | 4.658             | 7.21       | 9.62              | 2.46              | 4.824 | 7.15  | 10.11 | 2.99  |
| 2   | 4.259      | 8.39              | 15.77             | 7.39       | 3.680             | 9.45              | 12.66      | 3.24              | 3.946             | 9.38       | 13.29             | 3.93              | 4.178 | 9.15  | 13.74 | 4.61  |
| 3   | 3.797      | 9.77              | 19.41             | 9.65       | 3.143             | 11.40             | 15.89      | 4.50              | 3.425             | 11.19      | 16.48             | 5.31              | 3.708 | 10.71 | 16.73 | 6.02  |
| 4   | 3.461      | 10.87             | 22.83             | 11.96      | 2.736             | 13.14             | 19.03      | 5.90              | 3.037             | 12.74      | 19.64             | 6.91              | 3.368 | 11.96 | 19.48 | 7.52  |
| 5   | 3.214      | 11.77             | 26.05             | 14.289     | 2.414             | 14.70             | 22.20      | 7.51              | 2.736             | 14.07      | 22.91             | 8.85              | 3.115 | 12.96 | 22.08 | 9.12  |
| 6   | 3.033      | 12.49             | 29.04             | 16.56      | 2.152             | 16.12             | 25.46      | 9.34              | 2.497             | 15.22      | 26.41             | 11.19             | 2.925 | 13.76 | 24.53 | 10.77 |
| 7   | 2.899      | 13.07             | 31.69             | 18.64      | 1.938             | 17.41             | 28.85      | 11.44             | 2.298             | 16.22      | 30.17             | 13.95             | 2.780 | 14.39 | 26.76 | 12.37 |
| 8   | 2.800      | 13.52             | 33.94             | 20.43      | 1.759             | 18.59             | 32.40      | 13.81             | 2.136             | 17.09      | 34.24             | 17.15             | 2.668 | 14.89 | 28.72 | 13.83 |
| 9   | 2.726      | 13.89             | 35.73             | 21.86      | 1.607             | 19.67             | 36.17      | 16.50             | 2.002             | 17.83      | 38.66             | 20.83             | 2.582 | 15.29 | 30.36 | 15.08 |
| 10  | 2.670      | 14.18             | 37.05             | 22.90      | 1.478             | 20.65             | 40.14      | 19.49             | 1.890             | 18.47      | 43.40             | 24.94             | 2.514 | 15.60 | 31.64 | 16.04 |
| 11  | 2.629      | 14.40             | 37.90             | 23.53      | 1.366             | 21.55             | 44.39      | 22.84             | 1.794             | 19.01      | 48.55             | 29.54             | 2.461 | 15.84 | 32.56 | 16.72 |
| 12  | 2.595      | 14.59             | 38.33             | 23.77      | 1.269             | 22.38             | 48.87      | 26.49             | 1.715             | 19.49      | 53.95             | 34.47             | 2.417 | 16.06 | 33.12 | 17.08 |
| 13  | 2.569      | 14.73             | 38.36             | 23.66      | 1.184             | 23.13             | 53.65      | 30.53             | 1.646             | 19.89      | 59.77             | 39.88             | 2.382 | 16.21 | 33.37 | 17.17 |
| 14  | 2.547      | 14.86             | 38.05             | 23.21      | 1.111             | 23.82             | 58.75      | 34.94             | 1.590             | 20.25      | 65.77             | 45.53             | 2.352 | 16.36 | 33.30 | 16.96 |
| 15  | 2.529      | 14.94             | 37.51             | 22.60      | 1.043             | 24.44             | 64.09      | 39.66             | 1.539             | 20.53      | 72.19             | 51.67             | 2.327 | 16.44 | 33.08 | 16.65 |

## S5.2 Optimized geometries

Geometries of the push-pull chains used in the calculations. M06-2X/6-31+G(d) structures with  $C_s$  symmetry.

$N=1$

|   |            |            |           |
|---|------------|------------|-----------|
| 6 | 0.0000000  | 0.5963830  | 0.0000000 |
| 6 | 1.2823010  | 0.1763770  | 0.0000000 |
| 1 | -0.3523430 | 1.6173860  | 0.0000000 |
| 1 | 1.4729810  | -0.8928360 | 0.0000000 |
| 7 | 2.3701100  | 0.9751780  | 0.0000000 |
| 7 | -1.0480510 | -0.3763230 | 0.0000000 |
| 8 | -2.1936620 | 0.0554010  | 0.0000000 |
| 8 | -0.7633380 | -1.5703030 | 0.0000000 |
| 1 | 3.2981960  | 0.5847920  | 0.0000000 |
| 1 | 2.2889490  | 1.9813260  | 0.0000000 |

$N=2$

|   |            |            |           |
|---|------------|------------|-----------|
| 6 | -0.1029470 | -1.1232300 | 0.0000000 |
| 6 | 0.0000000  | 0.2177600  | 0.0000000 |
| 1 | -1.0137210 | -1.7054230 | 0.0000000 |
| 1 | 1.0059370  | 0.6353930  | 0.0000000 |
| 6 | -1.1101560 | 1.1224690  | 0.0000000 |
| 6 | -0.9040420 | 2.4643930  | 0.0000000 |
| 1 | -2.1222340 | 0.7228210  | 0.0000000 |
| 1 | 0.1130210  | 2.8508060  | 0.0000000 |
| 7 | -1.8645890 | 3.4202890  | 0.0000000 |
| 7 | 1.0804160  | -1.9430430 | 0.0000000 |
| 8 | 0.9025170  | -3.1547780 | 0.0000000 |
| 8 | 2.1829960  | -1.4088330 | 0.0000000 |
| 1 | -1.6308850 | 4.3993920  | 0.0000000 |
| 1 | -2.8441410 | 3.1768240  | 0.0000000 |

$N=3$

|   |            |            |           |
|---|------------|------------|-----------|
| 6 | -0.7938060 | -0.5366460 | 0.0000000 |
| 6 | -2.1376030 | -0.5518580 | 0.0000000 |
| 1 | -0.2813750 | -1.4973600 | 0.0000000 |
| 1 | -2.7960850 | 0.3057820  | 0.0000000 |
| 6 | 0.0000000  | 0.6607350  | 0.0000000 |
| 6 | 1.3563920  | 0.6188930  | 0.0000000 |
| 1 | -0.5127520 | 1.6213830  | 0.0000000 |

|   |            |            |           |
|---|------------|------------|-----------|
| 1 | 1.8363900  | -0.3620810 | 0.0000000 |
| 6 | 2.2261740  | 1.7586680  | 0.0000000 |
| 6 | 3.5756350  | 1.6173220  | 0.0000000 |
| 1 | 1.7826380  | 2.7531360  | 0.0000000 |
| 1 | 4.0122230  | 0.6205730  | 0.0000000 |
| 7 | 4.4866670  | 2.6246310  | 0.0000000 |
| 7 | -2.8567160 | -1.8019860 | 0.0000000 |
| 8 | -4.0788070 | -1.7244840 | 0.0000000 |
| 8 | -2.2315810 | -2.8545440 | 0.0000000 |
| 1 | 5.4756640  | 2.4385960  | 0.0000000 |
| 1 | 4.1959950  | 3.5909980  | 0.0000000 |

$N=4$

|   |            |            |           |
|---|------------|------------|-----------|
| 6 | 0.0000000  | 0.3186620  | 0.0000000 |
| 6 | 0.4173490  | -0.9721020 | 0.0000000 |
| 1 | -1.0743340 | 0.5133820  | 0.0000000 |
| 1 | 1.4832700  | -1.1957690 | 0.0000000 |
| 6 | 0.8638160  | 1.4663980  | 0.0000000 |
| 6 | 0.3906460  | 2.7382760  | 0.0000000 |
| 1 | 1.9395800  | 1.2923630  | 0.0000000 |
| 1 | -0.6923210 | 2.8813830  | 0.0000000 |
| 6 | 1.1941310  | 3.9274450  | 0.0000000 |
| 6 | 0.6357740  | 5.1631800  | 0.0000000 |
| 1 | 2.2780820  | 3.8212870  | 0.0000000 |
| 1 | -0.4476560 | 5.2646290  | 0.0000000 |
| 7 | 1.3060920  | 6.3467150  | 0.0000000 |
| 1 | 0.8182140  | 7.2266760  | 0.0000000 |
| 1 | 2.3146740  | 6.3748510  | 0.0000000 |
| 6 | -0.5091980 | -2.0716690 | 0.0000000 |
| 6 | -0.1404090 | -3.3633300 | 0.0000000 |
| 1 | -1.5753490 | -1.8512670 | 0.0000000 |
| 1 | 0.8696450  | -3.7495690 | 0.0000000 |
| 7 | -1.1335850 | -4.4108610 | 0.0000000 |
| 8 | -0.7090240 | -5.5591490 | 0.0000000 |
| 8 | -2.3202270 | -4.1121130 | 0.0000000 |

$N=5$

|   |            |            |           |
|---|------------|------------|-----------|
| 6 | -1.3549380 | 0.8052370  | 0.0000000 |
| 6 | 0.0000000  | 0.7344610  | 0.0000000 |
| 1 | -1.9218060 | -0.1281810 | 0.0000000 |
| 1 | 0.5855160  | 1.6537900  | 0.0000000 |
| 6 | -2.1184940 | 2.0228820  | 0.0000000 |

|   |            |            |           |
|---|------------|------------|-----------|
| 6 | -3.4749920 | 2.0414890  | 0.0000000 |
| 1 | -1.5690500 | 2.9642640  | 0.0000000 |
| 1 | -4.0005360 | 1.0838200  | 0.0000000 |
| 6 | -4.2933020 | 3.2219260  | 0.0000000 |
| 6 | -5.6468710 | 3.1519610  | 0.0000000 |
| 1 | -3.8005930 | 4.1934020  | 0.0000000 |
| 1 | -6.1360720 | 2.1799590  | 0.0000000 |
| 7 | -6.5061840 | 4.2081090  | 0.0000000 |
| 1 | -7.5032200 | 4.0739490  | 0.0000000 |
| 1 | -6.1652790 | 5.1576190  | 0.0000000 |
| 6 | 0.7146430  | -0.5125990 | 0.0000000 |
| 6 | 2.0654170  | -0.6325110 | 0.0000000 |
| 1 | 0.1133190  | -1.4236100 | 0.0000000 |
| 1 | 2.6874190  | 0.2615870  | 0.0000000 |
| 6 | 2.7172020  | -1.9151040 | 0.0000000 |
| 6 | 4.0502680  | -2.0761630 | 0.0000000 |
| 1 | 2.0991540  | -2.8112720 | 0.0000000 |
| 1 | 4.7981930  | -1.2950700 | 0.0000000 |
| 7 | 4.6308030  | -3.3987480 | 0.0000000 |
| 8 | 5.8536360  | -3.4523310 | 0.0000000 |
| 8 | 3.8947420  | -4.3758260 | 0.0000000 |

$N=6$

|   |            |            |           |
|---|------------|------------|-----------|
| C | 0.1191890  | 2.8303860  | 0.0000000 |
| C | 0.7258100  | 1.6170500  | 0.0000000 |
| H | -0.9723530 | 2.8643420  | 0.0000000 |
| H | 1.8147670  | 1.5642180  | 0.0000000 |
| C | 0.8046360  | 4.0945660  | 0.0000000 |
| C | 0.1583380  | 5.2868270  | 0.0000000 |
| H | 1.8946790  | 4.0767970  | 0.0000000 |
| H | -0.9340380 | 5.2785390  | 0.0000000 |
| C | 0.7905110  | 6.5776420  | 0.0000000 |
| C | 0.0723380  | 7.7264540  | 0.0000000 |
| H | 1.8791120  | 6.6194330  | 0.0000000 |
| H | -1.0149400 | 7.6824800  | 0.0000000 |
| N | 0.5787150  | 8.9915130  | 0.0000000 |
| H | -0.0226360 | 9.7979020  | 0.0000000 |
| H | 1.5742370  | 9.1543480  | 0.0000000 |
| C | 0.0000000  | 0.3760010  | 0.0000000 |
| C | 0.5705780  | -0.8546020 | 0.0000000 |
| H | -1.0896650 | 0.4441620  | 0.0000000 |
| H | 1.6571170  | -0.9417470 | 0.0000000 |
| C | -0.1961720 | -2.0710060 | 0.0000000 |
| C | 0.3347270  | -3.3183500 | 0.0000000 |

|   |            |            |           |
|---|------------|------------|-----------|
| H | -1.2827620 | -1.9681840 | 0.0000000 |
| H | 1.4165590  | -3.4448790 | 0.0000000 |
| C | -0.4881020 | -4.4992700 | 0.0000000 |
| C | 0.0021580  | -5.7488730 | 0.0000000 |
| H | -1.5700180 | -4.3789820 | 0.0000000 |
| H | 1.0445440  | -6.0370150 | 0.0000000 |
| N | -0.8871710 | -6.8878760 | 0.0000000 |
| O | -0.3537680 | -7.9892830 | 0.0000000 |
| O | -2.0961680 | -6.7029440 | 0.0000000 |

$N=7$

|   |            |            |           |
|---|------------|------------|-----------|
| C | -3.4185090 | 2.2364870  | 0.0000000 |
| C | -2.0649120 | 2.1532750  | 0.0000000 |
| H | -3.9955370 | 1.3093270  | 0.0000000 |
| H | -1.4743490 | 3.0698970  | 0.0000000 |
| C | -4.1686300 | 3.4642620  | 0.0000000 |
| C | -5.5237440 | 3.5051610  | 0.0000000 |
| H | -3.6054980 | 4.3978590  | 0.0000000 |
| H | -6.0659770 | 2.5568260  | 0.0000000 |
| C | -6.3221630 | 4.7012120  | 0.0000000 |
| C | -7.6758910 | 4.6591370  | 0.0000000 |
| H | -5.8105380 | 5.6630740  | 0.0000000 |
| H | -8.1853380 | 3.6975940  | 0.0000000 |
| N | -8.5146540 | 5.7340540  | 0.0000000 |
| H | -9.5140440 | 5.6202930  | 0.0000000 |
| H | -8.1542160 | 6.6761490  | 0.0000000 |
| C | -1.3511520 | 0.9045310  | 0.0000000 |
| C | 0.0000000  | 0.7867140  | 0.0000000 |
| H | -1.9535550 | -0.0060160 | 0.0000000 |
| H | 0.6144170  | 1.6873900  | 0.0000000 |
| C | 0.6795580  | -0.4807230 | 0.0000000 |
| C | 2.0270410  | -0.6334150 | 0.0000000 |
| H | 0.0532300  | -1.3748130 | 0.0000000 |
| H | 2.6664100  | 0.2494310  | 0.0000000 |
| C | 2.6682920  | -1.9209210 | 0.0000000 |
| C | 4.0098850  | -2.1130100 | 0.0000000 |
| H | 2.0165450  | -2.7963040 | 0.0000000 |
| H | 4.6785110  | -1.2531540 | 0.0000000 |
| C | 4.5946070  | -3.4287060 | 0.0000000 |
| C | 5.9175430  | -3.6542450 | 0.0000000 |
| H | 3.9321050  | -4.2924640 | 0.0000000 |
| H | 6.7027850  | -2.9105630 | 0.0000000 |
| N | 6.4339180  | -5.0045370 | 0.0000000 |
| O | 7.6524260  | -5.1159340 | 0.0000000 |



|   |           |            |           |
|---|-----------|------------|-----------|
| 0 | 5.6511570 | -5.9440290 | 0.0000000 |
|---|-----------|------------|-----------|

$N=8$

|   |            |             |           |
|---|------------|-------------|-----------|
| 6 | -0.2032730 | 5.3303320   | 0.0000000 |
| 6 | 0.5199570  | 4.1834790   | 0.0000000 |
| 1 | -1.2928950 | 5.2573520   | 0.0000000 |
| 1 | 1.6089740  | 4.2408820   | 0.0000000 |
| 6 | 0.3559650  | 6.6565450   | 0.0000000 |
| 6 | -0.3999730 | 7.7815820   | 0.0000000 |
| 1 | 1.4428880  | 6.7433940   | 0.0000000 |
| 1 | -1.4867200 | 7.6703110   | 0.0000000 |
| 6 | 0.1079950  | 9.1275410   | 0.0000000 |
| 6 | -0.7128090 | 10.2043970  | 0.0000000 |
| 1 | 1.1881170  | 9.2705390   | 0.0000000 |
| 1 | -1.7914170 | 10.0603620  | 0.0000000 |
| 7 | -0.3254960 | 11.5123450  | 0.0000000 |
| 1 | -0.9989980 | 12.2593390  | 0.0000000 |
| 1 | 0.6505760  | 11.7665610  | 0.0000000 |
| 6 | -0.0738470 | 2.8728700   | 0.0000000 |
| 6 | 0.6235960  | 1.7099590   | 0.0000000 |
| 1 | -1.1646600 | 2.8269750   | 0.0000000 |
| 1 | 1.7135770  | 1.7427310   | 0.0000000 |
| 6 | 0.0000000  | 0.4135460   | 0.0000000 |
| 6 | 0.6725890  | -0.7639200  | 0.0000000 |
| 1 | -1.0914230 | 0.3919090   | 0.0000000 |
| 1 | 1.7628830  | -0.7555250  | 0.0000000 |
| 6 | 0.0188760  | -2.0452970  | 0.0000000 |
| 6 | 0.6638860  | -3.2378670  | 0.0000000 |
| 1 | -1.0726670 | -2.0415720  | 0.0000000 |
| 1 | 1.7537710  | -3.2574880  | 0.0000000 |
| 6 | -0.0255550 | -4.5007150  | 0.0000000 |
| 6 | 0.5852900  | -5.7102030  | 0.0000000 |
| 1 | -1.1163370 | -4.4673190  | 0.0000000 |
| 1 | 1.6730750  | -5.7659930  | 0.0000000 |
| 6 | -0.1587670 | -6.9433350  | 0.0000000 |
| 6 | 0.4139170  | -8.1567150  | 0.0000000 |
| 1 | -1.2462390 | -6.8948680  | 0.0000000 |
| 1 | 1.4731940  | -8.3750270  | 0.0000000 |
| 7 | -0.3981320 | -9.3533560  | 0.0000000 |
| 8 | 0.2079100  | -10.4161510 | 0.0000000 |
| 8 | -1.6163330 | -9.2486850  | 0.0000000 |

$N=9$

|   |            |             |           |
|---|------------|-------------|-----------|
| C | -0.0274540 | -6.5806610  | 0.0000000 |
| C | -0.7071980 | -5.4078370  | 0.0000000 |
| H | 1.0641400  | -6.5490080  | 0.0000000 |
| H | -1.7976800 | -5.4252200  | 0.0000000 |
| C | -0.6368110 | -7.8851390  | 0.0000000 |
| C | 0.0746170  | -9.0385330  | 0.0000000 |
| H | -1.7263420 | -7.9298830  | 0.0000000 |
| H | 1.1648890  | -8.9699420  | 0.0000000 |
| C | -0.4857500 | -10.3640050 | 0.0000000 |
| C | 0.2914700  | -11.4724310 | 0.0000000 |
| H | -1.5707160 | -10.4643180 | 0.0000000 |
| H | 1.3749510  | -11.3713640 | 0.0000000 |
| N | -0.1476110 | -12.7644250 | 0.0000000 |
| H | 0.4956270  | -13.5375780 | 0.0000000 |
| H | -1.1329950 | -12.9795110 | 0.0000000 |
| C | -0.0666020 | -4.1188730  | 0.0000000 |
| C | -0.7228330 | -2.9325470  | 0.0000000 |
| H | 1.0251310  | -4.1117200  | 0.0000000 |
| H | -1.8134160 | -2.9283220  | 0.0000000 |
| C | -0.0566440 | -1.6569030  | 0.0000000 |
| C | -0.6911290 | -0.4587610  | 0.0000000 |
| H | 1.0348770  | -1.6707270  | 0.0000000 |
| H | -1.7813390 | -0.4338920  | 0.0000000 |
| C | 0.0000000  | 0.8033490   | 0.0000000 |
| C | -0.6111280 | 2.0135240   | 0.0000000 |
| H | 1.0909680  | 0.7681800   | 0.0000000 |
| H | -1.7004220 | 2.0611120   | 0.0000000 |
| C | 0.1076490  | 3.2600110   | 0.0000000 |
| C | -0.4759690 | 4.4834530   | 0.0000000 |
| H | 1.1975120  | 3.2004520   | 0.0000000 |
| H | -1.5634470 | 4.5585490   | 0.0000000 |
| C | 0.2768620  | 5.7100110   | 0.0000000 |
| C | -0.2723640 | 6.9483810   | 0.0000000 |
| H | 1.3645010  | 5.6212590   | 0.0000000 |
| H | -1.3559700 | 7.0588830   | 0.0000000 |
| C | 0.5327120  | 8.1429380   | 0.0000000 |
| C | 0.0208940  | 9.3829790   | 0.0000000 |
| H | 1.6163860  | 8.0401980   | 0.0000000 |
| H | -1.0262760 | 9.6535440   | 0.0000000 |
| N | 0.8914160  | 10.5381520  | 0.0000000 |
| O | 0.3385890  | 11.6294190  | 0.0000000 |

$N=10$

|   |            |           |           |
|---|------------|-----------|-----------|
| 6 | -0.8153940 | 7.7830720 | 0.0000000 |
|---|------------|-----------|-----------|

|   |            |             |           |
|---|------------|-------------|-----------|
| 6 | -0.0088240 | 6.6939160   | 0.0000000 |
| 1 | -1.8966200 | 7.6297230   | 0.0000000 |
| 1 | 1.0728690  | 6.8336690   | 0.0000000 |
| 6 | -0.3553630 | 9.1478210   | 0.0000000 |
| 6 | -1.1902320 | 10.2149240  | 0.0000000 |
| 1 | 0.7224840  | 9.3134280   | 0.0000000 |
| 1 | -2.2662010 | 10.0260070  | 0.0000000 |
| 6 | -0.7801610 | 11.5947440  | 0.0000000 |
| 6 | -1.6748220 | 12.6104910  | 0.0000000 |
| 1 | 0.2870980  | 11.8143770  | 0.0000000 |
| 1 | -2.7405550 | 12.3906000  | 0.0000000 |
| 7 | -1.3808220 | 13.9434010  | 0.0000000 |
| 1 | -2.1052840 | 14.6409470  | 0.0000000 |
| 1 | -0.4251070 | 14.2656230  | 0.0000000 |
| 6 | -0.4999860 | 5.3405110   | 0.0000000 |
| 6 | 0.2862240  | 4.2363650   | 0.0000000 |
| 1 | -1.5839150 | 5.2100690   | 0.0000000 |
| 1 | 1.3702830  | 4.3563660   | 0.0000000 |
| 6 | -0.2295240 | 2.8924080   | 0.0000000 |
| 6 | 0.5386060  | 1.7755440   | 0.0000000 |
| 1 | -1.3154060 | 2.7808420   | 0.0000000 |
| 1 | 1.6244520  | 1.8774670   | 0.0000000 |
| 6 | 0.0000000  | 0.4407750   | 0.0000000 |
| 6 | 0.7497470  | -0.6885350  | 0.0000000 |
| 1 | -1.0875190 | 0.3474510   | 0.0000000 |
| 1 | 1.8370870  | -0.6053730  | 0.0000000 |
| 6 | 0.1872380  | -2.0132380  | 0.0000000 |
| 6 | 0.9164950  | -3.1558630  | 0.0000000 |
| 1 | -0.9017500 | -2.0868790  | 0.0000000 |
| 1 | 2.0050880  | -3.0939920  | 0.0000000 |
| 6 | 0.3267210  | -4.4685680  | 0.0000000 |
| 6 | 1.0314710  | -5.6262670  | 0.0000000 |
| 1 | -0.7635410 | -4.5192960  | 0.0000000 |
| 1 | 2.1209620  | -5.5904640  | 0.0000000 |
| 6 | 0.4075460  | -6.9233990  | 0.0000000 |
| 6 | 1.0811000  | -8.0986270  | 0.0000000 |
| 1 | -0.6834270 | -6.9463860  | 0.0000000 |
| 1 | 2.1703280  | -8.0970420  | 0.0000000 |
| 6 | 0.4033400  | -9.3700290  | 0.0000000 |
| 6 | 1.0409100  | -10.5502080 | 0.0000000 |
| 1 | -0.6851290 | -9.3798490  | 0.0000000 |
| 1 | 2.1104960  | -10.7107900 | 0.0000000 |
| 7 | 0.2946900  | -11.7897110 | 0.0000000 |
| 8 | 0.9578780  | -12.8175390 | 0.0000000 |
| 8 | -0.9271680 | -11.7508810 | 0.0000000 |

N=11

|   |            |             |           |
|---|------------|-------------|-----------|
| 6 | -0.3116850 | -9.0643640  | 0.0000000 |
| 6 | -0.9624000 | -7.8756470  | 0.0000000 |
| 1 | 0.7803400  | -9.0599960  | 0.0000000 |
| 1 | -2.0531060 | -7.8674220  | 0.0000000 |
| 6 | -0.9541960 | -10.3535780 | 0.0000000 |
| 6 | -0.2742820 | -11.5253910 | 0.0000000 |
| 1 | -2.0446220 | -10.3696520 | 0.0000000 |
| 1 | 0.8174610  | -11.4868070 | 0.0000000 |
| 6 | -0.8711540 | -12.8355420 | 0.0000000 |
| 6 | -0.1261880 | -13.9654630 | 0.0000000 |
| 1 | -1.9585880 | -12.9051340 | 0.0000000 |
| 1 | 0.9597520  | -13.8956690 | 0.0000000 |
| 7 | -0.6022630 | -15.2450240 | 0.0000000 |
| 1 | 0.0185860  | -16.0361770 | 0.0000000 |
| 1 | -1.5933600 | -15.4317180 | 0.0000000 |
| 6 | -0.2927700 | -6.6007260  | 0.0000000 |
| 6 | -0.9233230 | -5.4010450  | 0.0000000 |
| 1 | 0.7988300  | -6.6175640  | 0.0000000 |
| 1 | -2.0137440 | -5.3747620  | 0.0000000 |
| 6 | -0.2327270 | -4.1375670  | 0.0000000 |
| 6 | -0.8454690 | -2.9286840  | 0.0000000 |
| 1 | 0.8583190  | -4.1716810  | 0.0000000 |
| 1 | -1.9353220 | -2.8858820  | 0.0000000 |
| 6 | -0.1353630 | -1.6761920  | 0.0000000 |
| 6 | -0.7300020 | -0.4583330  | 0.0000000 |
| 1 | 0.9549530  | -1.7270300  | 0.0000000 |
| 1 | -1.8189910 | -0.3985980  | 0.0000000 |
| 6 | 0.0000000  | 0.7825480   | 0.0000000 |
| 6 | -0.5756010 | 2.0095060   | 0.0000000 |
| 1 | 1.0893220  | 0.7144010   | 0.0000000 |
| 1 | -1.6633650 | 2.0870760   | 0.0000000 |
| 6 | 0.1752580  | 3.2377190   | 0.0000000 |
| 6 | -0.3797680 | 4.4740960   | 0.0000000 |
| 1 | 1.2632450  | 3.1512040   | 0.0000000 |
| 1 | -1.4658110 | 4.5711680   | 0.0000000 |
| 6 | 0.3941240  | 5.6877910   | 0.0000000 |
| 6 | -0.1369320 | 6.9344890   | 0.0000000 |
| 1 | 1.4802440  | 5.5805810   | 0.0000000 |
| 1 | -1.2203360 | 7.0551520   | 0.0000000 |
| 6 | 0.6659840  | 8.1294350   | 0.0000000 |
| 6 | 0.1659620  | 9.3881010   | 0.0000000 |
| 1 | 1.7490940  | 7.9969540   | 0.0000000 |
| 1 | -0.9125410 | 9.5406530   | 0.0000000 |

|   |            |            |           |
|---|------------|------------|-----------|
| 6 | 1.0165590  | 10.5511840 | 0.0000000 |
| 6 | 0.5512120  | 11.8090970 | 0.0000000 |
| 1 | 2.0955610  | 10.4076810 | 0.0000000 |
| 1 | -0.4851880 | 12.1184270 | 0.0000000 |
| 7 | 1.4642290  | 12.9316350 | 0.0000000 |
| 8 | 0.9518140  | 14.0422330 | 0.0000000 |
| 8 | 2.6684440  | 12.7215070 | 0.0000000 |

$N=12$

|   |            |            |           |
|---|------------|------------|-----------|
| 6 | -1.5210940 | 10.1985640 | 0.0000000 |
| 6 | -0.6615450 | 9.1510820  | 0.0000000 |
| 1 | -2.5933560 | 9.9916620  | 0.0000000 |
| 1 | 0.4118670  | 9.3447820  | 0.0000000 |
| 6 | -1.1293700 | 11.5849710 | 0.0000000 |
| 6 | -2.0152470 | 12.6098180 | 0.0000000 |
| 1 | -0.0609600 | 11.8036320 | 0.0000000 |
| 1 | -3.0807310 | 12.3687080 | 0.0000000 |
| 6 | -1.6725180 | 14.0083730 | 0.0000000 |
| 6 | -2.6143310 | 14.9801900 | 0.0000000 |
| 1 | -0.6169620 | 14.2788950 | 0.0000000 |
| 1 | -3.6684410 | 14.7100680 | 0.0000000 |
| 7 | -2.3839550 | 16.3261050 | 0.0000000 |
| 1 | -3.1407490 | 16.9883770 | 0.0000000 |
| 1 | -1.4446480 | 16.6932710 | 0.0000000 |
| 6 | -1.0838250 | 7.7740180  | 0.0000000 |
| 6 | -0.2429250 | 6.7113730  | 0.0000000 |
| 1 | -2.1597850 | 7.5891150  | 0.0000000 |
| 1 | 0.8336940  | 6.8864830  | 0.0000000 |
| 6 | -0.6884470 | 5.3418120  | 0.0000000 |
| 6 | 0.1369680  | 4.2670880  | 0.0000000 |
| 1 | -1.7670490 | 5.1740940  | 0.0000000 |
| 1 | 1.2159830  | 4.4266360  | 0.0000000 |
| 6 | -0.3281810 | 2.9041690  | 0.0000000 |
| 6 | 0.4832490  | 1.8188480  | 0.0000000 |
| 1 | -1.4088860 | 2.7512860  | 0.0000000 |
| 1 | 1.5642230  | 1.9642390  | 0.0000000 |
| 6 | 0.0000000  | 0.4623550  | 0.0000000 |
| 6 | 0.7977330  | -0.6330990 | 0.0000000 |
| 1 | -1.0825410 | 0.3235080  | 0.0000000 |
| 1 | 1.8804350  | -0.5017550 | 0.0000000 |
| 6 | 0.2962720  | -1.9828070 | 0.0000000 |
| 6 | 1.0793120  | -3.0888550 | 0.0000000 |
| 1 | -0.7880040 | -2.1071330 | 0.0000000 |
| 1 | 2.1636630  | -2.9728840 | 0.0000000 |

|   |            |             |           |
|---|------------|-------------|-----------|
| 6 | 0.5576530  | -4.4306880  | 0.0000000 |
| 6 | 1.3234250  | -5.5487740  | 0.0000000 |
| 1 | -0.5283860 | -4.5384970  | 0.0000000 |
| 1 | 2.4094250  | -5.4512850  | 0.0000000 |
| 6 | 0.7772660  | -6.8806770  | 0.0000000 |
| 6 | 1.5210750  | -8.0133210  | 0.0000000 |
| 1 | -0.3106080 | -6.9680140  | 0.0000000 |
| 1 | 2.6086980  | -7.9400540  | 0.0000000 |
| 6 | 0.9423000  | -9.3316200  | 0.0000000 |
| 6 | 1.6567870  | -10.4821060 | 0.0000000 |
| 1 | -0.1471620 | -9.3926690  | 0.0000000 |
| 1 | 2.7452870  | -10.4422350 | 0.0000000 |
| 6 | 1.0243750  | -11.7770390 | 0.0000000 |
| 6 | 1.7039580  | -12.9332850 | 0.0000000 |
| 1 | -0.0630320 | -11.8256460 | 0.0000000 |
| 1 | 2.7786430  | -13.0555000 | 0.0000000 |
| 7 | 1.0025760  | -14.1991510 | 0.0000000 |
| 8 | 1.7024680  | -15.2021610 | 0.0000000 |
| 8 | -0.2197570 | -14.2041030 | 0.0000000 |

$N=13$

|   |            |             |           |
|---|------------|-------------|-----------|
| 6 | -0.5829290 | -11.5394830 | 0.0000000 |
| 6 | -1.2193620 | -10.3433150 | 0.0000000 |
| 1 | 0.5090700  | -11.5481340 | 0.0000000 |
| 1 | -2.3099500 | -10.3223760 | 0.0000000 |
| 6 | -1.2408290 | -12.8213620 | 0.0000000 |
| 6 | -0.5755940 | -14.0013270 | 0.0000000 |
| 1 | -2.3314170 | -12.8242100 | 0.0000000 |
| 1 | 0.5165520  | -13.9764080 | 0.0000000 |
| 6 | -1.1888790 | -15.3043140 | 0.0000000 |
| 6 | -0.4586880 | -16.4435940 | 0.0000000 |
| 1 | -2.2771480 | -15.3599820 | 0.0000000 |
| 1 | 0.6280700  | -16.3879620 | 0.0000000 |
| 7 | -0.9513340 | -17.7173200 | 0.0000000 |
| 1 | -0.3407140 | -18.5163440 | 0.0000000 |
| 1 | -1.9447250 | -17.8911790 | 0.0000000 |
| 6 | -0.5351710 | -9.0756470  | 0.0000000 |
| 6 | -1.1520260 | -7.8691520  | 0.0000000 |
| 1 | 0.5561600  | -9.1048910  | 0.0000000 |
| 1 | -2.2421680 | -7.8309350  | 0.0000000 |
| 6 | -0.4481730 | -6.6124430  | 0.0000000 |
| 6 | -1.0488330 | -5.3978260  | 0.0000000 |
| 1 | 0.6424460  | -6.6577090  | 0.0000000 |
| 1 | -2.1383510 | -5.3450230  | 0.0000000 |

|   |            |            |           |
|---|------------|------------|-----------|
| 6 | -0.3282990 | -4.1506610 | 0.0000000 |
| 6 | -0.9142760 | -2.9289370 | 0.0000000 |
| 1 | 0.7615500  | -4.2099030 | 0.0000000 |
| 1 | -2.0030390 | -2.8628200 | 0.0000000 |
| 6 | -0.1784880 | -1.6907640 | 0.0000000 |
| 6 | -0.7504470 | -0.4624400 | 0.0000000 |
| 1 | 0.9105130  | -1.7630530 | 0.0000000 |
| 1 | -1.8383170 | -0.3835640 | 0.0000000 |
| 6 | 0.0000000  | 0.7668080  | 0.0000000 |
| 6 | -0.5579200 | 2.0015780  | 0.0000000 |
| 1 | 1.0880410  | 0.6817380  | 0.0000000 |
| 1 | -1.6447120 | 2.0933370  | 0.0000000 |
| 6 | 0.2074240  | 3.2214430  | 0.0000000 |
| 6 | -0.3355600 | 4.4628840  | 0.0000000 |
| 1 | 1.2943340  | 3.1231540  | 0.0000000 |
| 1 | -1.4209820 | 4.5685800  | 0.0000000 |
| 6 | 0.4461460  | 5.6721120  | 0.0000000 |
| 6 | -0.0795620 | 6.9209810  | 0.0000000 |
| 1 | 1.5316150  | 5.5589960  | 0.0000000 |
| 1 | -1.1630800 | 7.0432010  | 0.0000000 |
| 6 | 0.7219200  | 8.1170130  | 0.0000000 |
| 6 | 0.2181810  | 9.3747670  | 0.0000000 |
| 1 | 1.8053290  | 7.9856290  | 0.0000000 |
| 1 | -0.8623720 | 9.5187760  | 0.0000000 |
| 6 | 1.0465860  | 10.5525310 | 0.0000000 |
| 6 | 0.5728250  | 11.8211150 | 0.0000000 |
| 1 | 2.1266310  | 10.3972870 | 0.0000000 |
| 1 | -0.5022730 | 11.9960500 | 0.0000000 |
| 6 | 1.4473370  | 12.9666630 | 0.0000000 |
| 6 | 1.0074580  | 14.2335260 | 0.0000000 |
| 1 | 2.5231820  | 12.8012250 | 0.0000000 |
| 1 | -0.0224320 | 14.5639250 | 0.0000000 |
| 7 | 1.9432270  | 15.3376300 | 0.0000000 |
| 8 | 1.4531820  | 16.4581540 | 0.0000000 |
| 8 | 3.1428040  | 15.1030320 | 0.0000000 |

$N=14$

|   |           |            |           |
|---|-----------|------------|-----------|
| 6 | 2.8589820 | 12.4681490 | 0.0000000 |
| 6 | 1.9171830 | 11.4941480 | 0.0000000 |
| 1 | 3.9109840 | 12.1752540 | 0.0000000 |
| 1 | 0.8631900 | 11.7751180 | 0.0000000 |
| 6 | 2.5802730 | 13.8818980 | 0.0000000 |
| 6 | 3.5450020 | 14.8326610 | 0.0000000 |
| 1 | 1.5327490 | 14.1853430 | 0.0000000 |

|   |            |             |           |
|---|------------|-------------|-----------|
| 1 | 4.5879220  | 14.5075780  | 0.0000000 |
| 6 | 3.3147520  | 16.2543690  | 0.0000000 |
| 6 | 4.3305920  | 17.1482250  | 0.0000000 |
| 1 | 2.2840230  | 16.6079700  | 0.0000000 |
| 1 | 5.3599100  | 16.7952060  | 0.0000000 |
| 7 | 4.2080200  | 18.5085350  | 0.0000000 |
| 1 | 5.0151550  | 19.1083740  | 0.0000000 |
| 1 | 3.3009730  | 18.9493530  | 0.0000000 |
| 6 | 2.2243700  | 10.0866530  | 0.0000000 |
| 6 | 1.2978450  | 9.0979680   | 0.0000000 |
| 1 | 3.2812430  | 9.8130940   | 0.0000000 |
| 1 | 0.2397240  | 9.3631000   | 0.0000000 |
| 6 | 1.6257170  | 7.6952780   | 0.0000000 |
| 6 | 0.7115440  | 6.6951840   | 0.0000000 |
| 1 | 2.6860760  | 7.4362570   | 0.0000000 |
| 1 | -0.3497590 | 6.9472580   | 0.0000000 |
| 6 | 1.0566830  | 5.2966820   | 0.0000000 |
| 6 | 0.1537150  | 4.2865150   | 0.0000000 |
| 1 | 2.1199270  | 5.0501950   | 0.0000000 |
| 1 | -0.9103440 | 4.5265990   | 0.0000000 |
| 6 | 0.5148510  | 2.8920800   | 0.0000000 |
| 6 | -0.3770980 | 1.8722110   | 0.0000000 |
| 1 | 1.5807340  | 2.6575440   | 0.0000000 |
| 1 | -1.4437350 | 2.1003970   | 0.0000000 |
| 6 | 0.0000000  | 0.4820530   | 0.0000000 |
| 6 | -0.8804090 | -0.5477800  | 0.0000000 |
| 1 | 1.0684600  | 0.2597230   | 0.0000000 |
| 1 | -1.9495970 | -0.3321250  | 0.0000000 |
| 6 | -0.4864890 | -1.9331770  | 0.0000000 |
| 6 | -1.3542980 | -2.9736640  | 0.0000000 |
| 1 | 0.5845940  | -2.1424210  | 0.0000000 |
| 1 | -2.4260910 | -2.7717620  | 0.0000000 |
| 6 | -0.9419520 | -4.3535520  | 0.0000000 |
| 6 | -1.7955710 | -5.4057450  | 0.0000000 |
| 1 | 0.1318580  | -4.5482910  | 0.0000000 |
| 1 | -2.8700730 | -5.2194350  | 0.0000000 |
| 6 | -1.3623120 | -6.7790300  | 0.0000000 |
| 6 | -2.1993320 | -7.8444850  | 0.0000000 |
| 1 | -0.2856120 | -6.9571420  | 0.0000000 |
| 1 | -3.2767030 | -7.6766190  | 0.0000000 |
| 6 | -1.7411300 | -9.2095010  | 0.0000000 |
| 6 | -2.5575920 | -10.2906350 | 0.0000000 |
| 1 | -0.6613000 | -9.3675690  | 0.0000000 |
| 1 | -3.6380810 | -10.1462120 | 0.0000000 |
| 6 | -2.0667610 | -11.6444500 | 0.0000000 |



|   |            |             |           |
|---|------------|-------------|-----------|
| 6 | -2.8558950 | -12.7448200 | 0.0000000 |
| 1 | -0.9837310 | -11.7772620 | 0.0000000 |
| 1 | -3.9393460 | -12.6327040 | 0.0000000 |
| 6 | -2.3108580 | -14.0790840 | 0.0000000 |
| 6 | -3.0658490 | -15.1873510 | 0.0000000 |
| 1 | -1.2291060 | -14.2001050 | 0.0000000 |
| 1 | -4.1462740 | -15.2379960 | 0.0000000 |
| 7 | -2.4498120 | -16.4971390 | 0.0000000 |
| 8 | -3.2145850 | -17.4514520 | 0.0000000 |
| 8 | -1.2305400 | -16.5827110 | 0.0000000 |

$N=15$

|   |            |             |           |
|---|------------|-------------|-----------|
| 6 | -0.8489200 | -14.0098190 | 0.0000000 |
| 6 | -1.4760940 | -12.8089320 | 0.0000000 |
| 1 | 0.2429730  | -14.0269940 | 0.0000000 |
| 1 | -2.5665370 | -12.7798920 | 0.0000000 |
| 6 | -1.5169990 | -15.2866820 | 0.0000000 |
| 6 | -0.8616920 | -16.4720350 | 0.0000000 |
| 1 | -2.6076060 | -15.2806590 | 0.0000000 |
| 1 | 0.2306240  | -16.4563600 | 0.0000000 |
| 6 | -1.4861530 | -17.7699670 | 0.0000000 |
| 6 | -0.7662330 | -18.9155980 | 0.0000000 |
| 1 | -2.5748980 | -17.8160480 | 0.0000000 |
| 1 | 0.3209840  | -18.8697560 | 0.0000000 |
| 7 | -1.2703110 | -20.1851290 | 0.0000000 |
| 1 | -0.6668400 | -20.9895360 | 0.0000000 |
| 1 | -2.2651970 | -20.3500840 | 0.0000000 |
| 6 | -0.7827760 | -11.5459570 | 0.0000000 |
| 6 | -1.3912380 | -10.3353870 | 0.0000000 |
| 1 | 0.3083130  | -11.5829230 | 0.0000000 |
| 1 | -2.4811570 | -10.2900070 | 0.0000000 |
| 6 | -0.6795410 | -9.0827970  | 0.0000000 |
| 6 | -1.2730460 | -7.8648690  | 0.0000000 |
| 1 | 0.4107710  | -9.1346880  | 0.0000000 |
| 1 | -2.3623320 | -7.8061920  | 0.0000000 |
| 6 | -0.5463530 | -6.6209350  | 0.0000000 |
| 6 | -1.1269060 | -5.3968500  | 0.0000000 |
| 1 | 0.5431910  | -6.6852880  | 0.0000000 |
| 1 | -2.2155000 | -5.3266120  | 0.0000000 |
| 6 | -0.3871830 | -4.1606180  | 0.0000000 |
| 6 | -0.9560840 | -2.9311260  | 0.0000000 |
| 1 | 0.7015890  | -4.2359710  | 0.0000000 |
| 1 | -2.0439370 | -2.8504710  | 0.0000000 |
| 6 | -0.2045910 | -1.7020360  | 0.0000000 |

|   |            |            |           |
|---|------------|------------|-----------|
| 6 | -0.7626010 | -0.4675850 | 0.0000000 |
| 1 | 0.8833890  | -1.7874780 | 0.0000000 |
| 1 | -1.8496530 | -0.3771530 | 0.0000000 |
| 6 | 0.0000000  | 0.7545720  | 0.0000000 |
| 6 | -0.5473250 | 1.9938050  | 0.0000000 |
| 1 | 1.0871520  | 0.6594530  | 0.0000000 |
| 1 | -1.6334810 | 2.0939230  | 0.0000000 |
| 6 | 0.2264080  | 3.2088140  | 0.0000000 |
| 6 | -0.3097200 | 4.4529720  | 0.0000000 |
| 1 | 1.3126370  | 3.1038070  | 0.0000000 |
| 1 | -1.3948010 | 4.5634120  | 0.0000000 |
| 6 | 0.4760500  | 5.6600380  | 0.0000000 |
| 6 | -0.0473890 | 6.9096500  | 0.0000000 |
| 1 | 1.5611690  | 5.5441270  | 0.0000000 |
| 1 | -1.1310730 | 7.0320520  | 0.0000000 |
| 6 | 0.7525830  | 8.1071060  | 0.0000000 |
| 6 | 0.2448640  | 9.3632290  | 0.0000000 |
| 1 | 1.8362300  | 7.9780470  | 0.0000000 |
| 1 | -0.8368220 | 9.5008070  | 0.0000000 |
| 6 | 1.0631350  | 10.5480550 | 0.0000000 |
| 6 | 0.5764850  | 11.8123760 | 0.0000000 |
| 1 | 2.1445990  | 10.4017680 | 0.0000000 |
| 1 | -0.5020290 | 11.9709590 | 0.0000000 |
| 6 | 1.4207360  | 12.9790440 | 0.0000000 |
| 6 | 0.9637070  | 14.2536180 | 0.0000000 |
| 1 | 2.4985930  | 12.8094140 | 0.0000000 |
| 1 | -0.1089870 | 14.4427440 | 0.0000000 |
| 6 | 1.8532710  | 15.3877350 | 0.0000000 |
| 6 | 1.4297710  | 16.6600470 | 0.0000000 |
| 1 | 2.9268580  | 15.2082650 | 0.0000000 |
| 1 | 0.4042500  | 17.0038140 | 0.0000000 |
| 7 | 2.3798750  | 17.7521200 | 0.0000000 |
| 8 | 1.9042230  | 18.8787480 | 0.0000000 |
| 8 | 3.5762260  | 17.5019260 | 0.0000000 |

## S6 Results for the quadrupolar set

Table S-9: Ground-state traceless quadrupole moment,  $Q^{\text{GS}}$ , given in Debye.Ångströms.

|           |          | CC2   | B3LYP | PBE0  | M06   | BMK   | SOGGA11-X | M06-2X | M06-HF | CAM-B3LYP | M11   | $\omega$ B97X-D |
|-----------|----------|-------|-------|-------|-------|-------|-----------|--------|--------|-----------|-------|-----------------|
| <b>Q1</b> | $Q_{yy}$ | 3.15  | 3.14  | 3.28  | 2.90  | 3.28  | 3.26      | 3.29   | 3.84   | 3.26      | 3.45  | 3.27            |
|           | $Q_{zz}$ | 4.86  | 4.32  | 4.79  | 4.51  | 4.90  | 4.86      | 5.03   | 6.04   | 4.55      | 5.25  | 4.84            |
| <b>Q2</b> | $Q_{yy}$ | 3.16  | 3.00  | 3.17  | 2.78  | 3.15  | 3.15      | 3.17   | 3.68   | 3.13      | 3.38  | 3.16            |
|           | $Q_{zz}$ | 10.20 | 9.81  | 10.56 | 9.86  | 10.88 | 10.70     | 10.93  | 12.84  | 10.21     | 11.31 | 10.66           |
| <b>Q3</b> | $Q_{yy}$ | -0.54 | -0.85 | -0.87 | -0.98 | -1.04 | -0.94     | -0.96  | -1.01  | -0.81     | -0.88 | -0.89           |
|           | $Q_{zz}$ | 17.90 | 17.86 | 19.00 | 17.71 | 19.54 | 19.20     | 19.52  | 22.55  | 18.42     | 20.15 | 19.09           |
| <b>Q4</b> | $Q_{yy}$ | 5.17  | 5.19  | 5.50  | 4.79  | 5.46  | 5.47      | 5.51   | 6.50   | 5.40      | 5.79  | 5.48            |
|           | $Q_{zz}$ | 6.04  | 5.26  | 5.87  | 5.56  | 6.06  | 5.96      | 6.21   | 7.52   | 5.58      | 6.52  | 5.95            |
| <b>Q5</b> | $Q_{yy}$ | 6.38  | 6.55  | 6.91  | 5.94  | 6.83  | 6.86      | 6.88   | 8.16   | 6.79      | 7.22  | 6.87            |
|           | $Q_{zz}$ | 7.89  | 6.64  | 7.54  | 7.21  | 7.81  | 7.66      | 8.04   | 9.81   | 7.10      | 8.50  | 7.66            |

Table S-10: Excited-state traceless quadrupole moment,  $Q^{\text{ES}}$ , given in Debye.Ångströms.

|           |                                  |          | CC2   | B3LYP | PBE0  | M06   | BMK   | SOGGA11-X | M06-2X | M06-HF | CAM-B3LYP | M11   | $\omega$ B97X-D |
|-----------|----------------------------------|----------|-------|-------|-------|-------|-------|-----------|--------|--------|-----------|-------|-----------------|
| <b>Q1</b> | $B_1 (\pi \rightarrow \pi^*)$    | $Q_{yy}$ | 2.42  | 2.51  | 2.68  | 1.56  | 2.74  | 2.59      | 2.60   | 3.06   | 2.64      | 2.42  | 2.71            |
|           |                                  | $Q_{zz}$ | 5.94  | 5.11  | 5.47  | 7.81  | 5.47  | 5.79      | 5.99   | 7.31   | 5.34      | 7.51  | 5.48            |
| <b>Q2</b> | $B_{3u} (\pi \rightarrow \pi^*)$ | $Q_{yy}$ | 3.94  | 3.94  | 4.08  | 3.66  | 4.06  | 4.08      | 4.05   | 4.52   | 4.01      | 4.14  | 4.03            |
|           |                                  | $Q_{zz}$ | 7.85  | 7.02  | 7.83  | 7.30  | 8.16  | 8.02      | 8.36   | 10.49  | 7.61      | 8.98  | 8.08            |
| <b>Q3</b> | $B_1 (\pi \rightarrow \pi^*)$    | $Q_{yy}$ | 0.85  | 1.02  | 0.94  | 0.67  | 0.75  | 0.81      | 2.51   | 0.81   | 0.81      | 1.87  | 0.69            |
|           |                                  | $Q_{zz}$ | 14.56 | 13.38 | 14.66 | 13.81 | 15.33 | 15.11     | 12.81  | 18.27  | 14.62     | 14.75 | 15.39           |
| <b>Q4</b> | $B_{2u} (\pi \rightarrow \pi^*)$ | $Q_{yy}$ | 6.65  | 6.50  | 6.82  | 6.23  | 6.82  | 6.93      | 6.96   | 8.19   | 6.76      | 7.21  | 6.74            |
|           |                                  | $Q_{zz}$ | 4.32  | 3.60  | 4.24  | 3.82  | 4.46  | 4.21      | 4.53   | 5.75   | 3.96      | 4.93  | 4.50            |
| <b>Q5</b> | $B_{2u} (\pi \rightarrow \pi^*)$ | $Q_{yy}$ | 7.77  | 7.81  | 8.17  | 7.30  | 8.14  | 8.26      | 8.26   | 9.69   | 8.11      | 8.57  | 8.08            |
|           |                                  | $Q_{zz}$ | 6.29  | 5.06  | 5.99  | 5.56  | 6.29  | 6.00      | 6.47   | 8.30   | 5.55      | 6.99  | 6.29            |

Table S-11: Statistical analysis obtained for the compounds of Scheme 3 (Tables S-9 and S-10). See caption of Table S-4 for definitions.

|                 | $Q^{\text{GS}}$ |       |        |        |       | $Q^{\text{ES}}$ |       |        |        |       |
|-----------------|-----------------|-------|--------|--------|-------|-----------------|-------|--------|--------|-------|
|                 | MSE             | MAE   | Max(+) | Max(-) | $R^2$ | MSE             | MAE   | Max(+) | Max(-) | $R^2$ |
| B3LYP           | -0.330          | 0.368 | 0.165  | -1.250 | 0.993 | -0.466          | 0.526 | 0.168  | -1.230 | 0.985 |
| PBE0            | 0.154           | 0.339 | 1.100  | -0.352 | 0.997 | 0.030           | 0.204 | 0.408  | -0.474 | 0.995 |
| M06             | -0.393          | 0.393 | -0.187 | -0.678 | 0.999 | -0.289          | 0.662 | 1.870  | -0.863 | 0.956 |
| BMK             | 0.265           | 0.384 | 1.640  | -0.503 | 0.998 | 0.161           | 0.276 | 0.762  | -0.473 | 0.996 |
| SOGGA11-X       | 0.198           | 0.343 | 1.310  | -0.403 | 0.998 | 0.120           | 0.241 | 0.548  | -0.291 | 0.997 |
| M06-2X          | 0.340           | 0.425 | 1.630  | -0.426 | 0.999 | 0.194           | 0.545 | 1.660  | -1.750 | 0.976 |
| M06-HF          | 1.570           | 1.670 | 4.660  | -0.479 | 1.000 | 1.580           | 1.590 | 3.700  | -0.044 | 0.996 |
| CAM-B3LYP       | -0.058          | 0.314 | 0.528  | -0.789 | 0.995 | -0.119          | 0.281 | 0.345  | -0.742 | 0.991 |
| M11             | 0.648           | 0.716 | 2.250  | -0.341 | 0.999 | 0.678           | 0.678 | 1.570  | 0.004  | 0.984 |
| $\omega$ B97X-D | 0.189           | 0.326 | 1.190  | -0.351 | 0.998 | 0.139           | 0.265 | 0.825  | -0.464 | 0.996 |
